# Supplementary material
Source: PubMed Central journal article supplement (PMC9912168)
Supplement: jama-e230550-s002.pdf [file jama-e230550-s002.pdf]

1  
2  
3  
4  
5  
6  
7  
8  
9  
10  
11  
12  
13  
14  
15  
16  
17  
18  
19  
20  
21  
22  
23

**ARGATROBAN PLUS R-TPA FOR ACUTE ISCHAEMIC STROKE (ARAI):  
A PROSPECTIVE, RANDOMISED, OPEN-LABEL, BLINDED-END POINT,  
MULTI-CENTRE, TRIAL**

**STATISTICAL ANALYSIS PLAN**

**ClinicalTrials.gov registration number: NCT03740958**

Protocol version and date: Version 1.0, 28<sup>th</sup> October 2018

**Chief Investigators:** Prof Hui-Sheng Chen, Prof Yi-Long Wang

**Trial statisticians:** Dr Yu Cui, Prof Duolao Wang

**SAP authors:** Dr Yu Cui, Prof Duolao Wang, Prof Hui-Sheng Chen

24

| SAP version history |               |                    |
|---------------------|---------------|--------------------|
| Version Date        | SAP Version # | Details of Changes |
| 28 October 2018     | 1.0           | First version      |

25

| Signatures                               |                                                                                      |            |
|------------------------------------------|--------------------------------------------------------------------------------------|------------|
|                                          | Signature                                                                            | Date       |
| Dr Yu Cui (Trial Statistician)           | 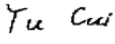  | 28/10/2018 |
| Prof Duolao Wang (Trial Statistician)    |  |            |
| Prof Hui-Sheng Chen (Chief Investigator) |  |            |
| Prof Yi-Long Wang (Chief Investigator)   |  |            |
| Prof Yi Yang (IDMC Chair)                |  |            |

26

## TABLE OF CONTENTS

|    |                                                                          |    |
|----|--------------------------------------------------------------------------|----|
| 28 | ABBREVIATIONS .....                                                      | 5  |
| 29 | 1. INTRODUCTION .....                                                    | 6  |
| 30 | 1.1. Purpose of the statistical analysis plan.....                       | 6  |
| 31 | 1.2. Background to the study .....                                       | 6  |
| 32 | 2. STUDY OBJECTIVES AND OUTCOMES .....                                   | 7  |
| 33 | 2.1. Study Objectives .....                                              | 7  |
| 34 | 2.1.1. Primary Objective.....                                            | 7  |
| 35 | 2.1.2. Secondary Objectives.....                                         | 7  |
| 36 | 2.2. Outcomes .....                                                      | 7  |
| 37 | 2.2.1. Primary outcome .....                                             | 7  |
| 38 | 2.2.2. Secondary outcomes .....                                          | 7  |
| 39 | 2.2.3. Safety outcomes .....                                             | 7  |
| 40 | 2.2.4. Case ascertainment and case definitions .....                     | 8  |
| 41 | 3. STUDY DESIGN .....                                                    | 8  |
| 42 | 3.1. Design .....                                                        | 8  |
| 43 | 3.2. Trial Sites.....                                                    | 8  |
| 44 | 3.3. Treatments .....                                                    | 8  |
| 45 | 3.4. Randomisation.....                                                  | 9  |
| 46 | 3.5. Sample Size.....                                                    | 9  |
| 47 | 4. ANALYSIS POPULATIONS .....                                            | 9  |
| 48 | 4.1. Study population data sets.....                                     | 9  |
| 49 | 4.2. Analysis Close Date .....                                           | 10 |
| 50 | 4.3. Data cleaning.....                                                  | 10 |
| 51 | 4.4. Data download.....                                                  | 10 |
| 52 | 5. STATISTICAL ANALYSES .....                                            | 10 |
| 53 | 5.1. Primary Outcome Analysis .....                                      | 11 |
| 54 | 5.1.1. mITT analysis of the primary outcome - the primary analysis ..... | 11 |
| 55 | 5.1.2. PP analysis of the primary outcome.....                           | 11 |
| 56 | 5.1.3. Sensitivity analysis of the primary outcome .....                 | 11 |
| 57 | 5.1.4. Covariate adjusted analysis of the primary outcome .....          | 11 |
| 58 | 5.1.5. Subgroup analysis of the primary outcome .....                    | 12 |
| 59 | 5.2. Secondary Outcome Analysis.....                                     | 12 |
| 60 | 5.2.1 Analysis of binary outcomes .....                                  | 13 |
| 61 | 5.2.2 Analysis of time-to-event outcomes .....                           | 13 |
| 62 | 5.2.3 Analysis of secondary outcomes with repeated measurements ...      | 13 |
| 63 | 5.3. Exploratory Analysis.....                                           | 13 |
| 64 | 6. SAFETY ANALYSES .....                                                 | 13 |
| 65 | 6.1. Safety Variables.....                                               | 13 |
| 66 | 7. GENERAL CONSIDERATIONS FOR DATA ANALYSES.....                         | 14 |
| 67 | 7.1. Covariates Analyses .....                                           | 14 |
| 68 | 7.2. Subgroup Analysis .....                                             | 14 |
| 69 | 7.3. Multiplicity .....                                                  | 14 |

|    |       |                                    |    |
|----|-------|------------------------------------|----|
| 70 | 7.4.  | Missing data .....                 | 15 |
| 71 | 7.4.1 | Baseline covariates .....          | 15 |
| 72 | 7.4.2 | Efficacy outcomes .....            | 15 |
| 73 | 7.5.  | Further Exploratory Analyses ..... | 15 |
| 74 | 7.6.  | Data Summaries.....                | 15 |
| 75 | 8.    | REFERENCES.....                    | 16 |
| 76 |       |                                    |    |

77 **ABBREVIATIONS**

| <b>Abbreviation</b> | <b>Explanation</b>                                                        |
|---------------------|---------------------------------------------------------------------------|
| AE                  | Adverse Event                                                             |
| AIS                 | Acute ischaemic stroke                                                    |
| ARTSS               | Argatroban With Recombinant Tissue Plasminogen Activator for Acute Stroke |
| CI                  | Confidence Interval                                                       |
| CRF                 | Clinical Research Form                                                    |
| GLM                 | Generalised Linear Model                                                  |
| GMR                 | Geometric Mean Ratio                                                      |
| HR                  | Hazard Ratio                                                              |
| IDMC                | Independent Data Monitoring Committee                                     |
| mITT                | Modified Intent-to-treat                                                  |
| mRS                 | Modified Rankin Scale                                                     |
| NIHSS               | National Institute of Health Stroke Scale                                 |
| OR                  | Odds Ratio                                                                |
| PP                  | Per-protocol                                                              |
| RD                  | Risk Difference                                                           |
| RR                  | Risk Ratio                                                                |
| r-tPA               | Recombinant tissue-type plasminogen activator                             |
| SAP                 | Statistical Analysis Plan                                                 |

78

79

80

81       **1.       INTRODUCTION**

82       **1.1.     Purpose of the statistical analysis plan**

83     The purpose of this Statistical Analysis Plan (SAP) is to define the outcome variables, statistical  
84     methods, and analysis strategies to address the study’s objectives in a multicentre, open-label,  
85     blinded-end point, randomised controlled trial to compare argatroban plus recombinant tissue-  
86     type plasminogen activator (r-tPA) with r-tPA alone treatment for acute ischaemic stroke (AIS):  
87     the ARIAS trial (Protocol version 1.0, 28/10/2018).

88       **1.2.     Background to the study**

89       Vessel recanalisation is associated with lower mortality and improved functional outcome in  
90     patients with acute ischaemic stroke (AIS).<sup>1</sup> Intravenous thrombolysis with recombinant tissue  
91     plasminogen activator (r-tPA) has strongly been recommended in the early management of AIS.<sup>2</sup>  
92     However, only 20–30% of patients who received r-tPA achieved complete recanalisation.<sup>3</sup>  
93     Although the efficacy of endovascular therapy has been demonstrated in acute ischaemic stroke  
94     with large vessel occlusion,<sup>4-9</sup> the treatment largely depends on devices available at hospitals and  
95     experienced clinicians, limiting its use in clinical practice. Therefore, it is necessary to explore an  
96     effective and simple way to achieve vessel recanalisation in acute ischaemic stroke patients.

97       Argatroban, a selective thrombin inhibitor, directly inhibits free and clot-associated thrombin  
98     and thrombin-induced activities. Preclinical and clinical studies have shown that argatroban is  
99     safe and may offer benefits in patients with AIS.<sup>10-14</sup> In animal studies, argatroban plus r-tPA  
100     reportedly enhanced and sustained arterial recanalisation with thrombolysis using r-tPA<sup>15</sup>,  
101     indicating the promise of adjunctive therapy in improving the prognosis after stroke. In patients  
102     with AIS, both ARTSS (Argatroban With Recombinant Tissue Plasminogen Activator for Acute  
103     Stroke)-1 and ARTSS-2 trials have suggested that the combination of argatroban with r-tPA is  
104     potentially safe and might have a favorable outcome<sup>16-18</sup>.

105       However, ARTSS-1 and ARTSS-2 were exploratory in nature, and no definitive conclusions  
106     could be drawn because of the small sample size. Our trial aims to investigate the efficacy and  
107     safety of argatroban plus r-tPA in patients with AIS. We hypothesise that argatroban plus r-tPA  
108     might be superior to r-tPA alone in improving the functional outcomes without increasing the risk  
109     of intracerebral haemorrhage.

110

111 Based on the above discussion, this study intends to investigate the efficacy and safety of the  
112 combined application of alteplase and argatroban in the treatment of AIS.

## 113 **2. STUDY OBJECTIVES AND OUTCOMES**

### 114 **2.1. Study Objectives**

#### 115 **2.1.1. Primary Objective**

116 To test the hypothesis that argatroban plus r-tPA will be superior to r-tPA alone in improving  
117 excellent functional outcomes in patients with AIS.

#### 118 **2.1.2. Secondary Objectives**

- 119 1. To determine the proportion of favorable functional outcome at 90 days by treatment  
120 group.
- 121 2. To determine occurrence of early neurological improvement at 48 hours by treatment  
122 group.
- 123 3. To determine occurrence of early neurological deterioration at 48 hours by treatment  
124 group.
- 125 4. To determine change in neurological function at 14 days by treatment group.
- 126 5. To determine occurrence of stroke or other vascular events at 90 days by treatment  
127 group.

### 128 **2.2. Outcomes**

#### 129 **2.2.1. Primary outcome**

130 The primary outcome is excellent functional outcome at 90 days(binary outcome), defined as a  
131 score of 0–1 on the mRS (modified Rankin Scale) for the evaluation of neurological disability  
132 assessed in person or, if an in-person visit was not possible, by personnel certified in the scoring  
133 of the mRS at 90 days after randomisation through telephone.

#### 134 **2.2.2. Secondary outcomes**

- 135 1. Proportion of mRS (0-2) at 90 days (binary outcome)
- 136 2. Occurrence of early neurological improvement at 48 hours (binary outcome)
- 137 3. Occurrence of early neurological deterioration at 48 hours (binary outcome)
- 138 4. Change in NIHSS (National Institute of Health Stroke Scale) score compared with  
139 baseline at 14 days (continuous outcome)
- 140 5. The occurrence of stroke or other vascular events at 90 days (time-to-event outcome)

#### 141 **2.2.3. Safety outcomes**

- 142 1. Proportion of symptomatic intracerebral haemorrhage;
- 143 2. Proportion of parenchymal hematoma type 2;

144 3. Proportion of major systemic bleeding.

#### 145 2.2.4. Case ascertainment and case definitions

##### 146 (1) *Deaths*

147 All deaths during the study period will be recorded. Cause of death will be clinically ascertained  
148 by the study physicians (participants will not receive post-mortems). Mortality by treatment  
149 group will be analysed with all-cause mortality within 90 days as the secondary outcome.

##### 150 (2) *Early neurological improvement*

151 Early neurological improvement was defined as more than 2 NIHSS scores decrease<sup>19</sup>, compared  
152 with baseline at 48 hours.

##### 153 (3) *Early neurological deterioration*

154 Early neurological deterioration was defined as more than 4 NIHSS scores increase<sup>20</sup>, but not  
155 result of cerebral haemorrhage, compared with baseline at 48 hours.

##### 156 (4) *Stroke*

157 Stroke was defined as an acute focal central neurological deficit lasting >24 hours that resulted in  
158 irreversible brain damage or body impairment by a vascular cause<sup>21</sup>.

##### 159 (5) *Other vascular events*

160 Other vascular events include pulmonary embolism, peripheral vessel incident, and  
161 cardiovascular incident.

### 162 3. STUDY DESIGN

#### 163 3.1. Design

164 This is a multicentre, open-label, blinded-end point, randomised controlled trial in patients with  
165 AIS.

#### 166 3.2. Trial Sites

167 Trial recruitment will take place at about forty hospitals nationwide. The trial sites build on  
168 prior successful collaborations, and have been selected due to their proven ability to successfully  
169 execute clinical trials of acute ischaemic stroke, and to reflect a spectrum of China health care  
170 settings.

#### 171 3.3. Treatments

##### 172 **Trial arms:**

173 The study regimens are:



174 **argatroban plus r-tPA group:** patients were administrated with intravenous r-tPA (0.9 mg/kg;  
175 maximum dose 90 mg, 10% administered as 1-minute bolus, the remaining infused over 1 hour;  
176 Boehringer Ingelheim Co., Ltd) and 100 µg/kg intravenous argatroban (Tianjin Institute of  
177 Pharmaceutical Research Co, Ltd) bolus over 3 to 5 minutes within 1 hour of the r-tPA bolus  
178 followed by argatroban infusion of 1.0 µg/kg per minute for 48 hours.

179 **r-tPA alone group:** patients were administrated with intravenous r-tPA (0.9 mg/kg; maximum  
180 dose 90 mg, 10% administered as 1-minute bolus, the remaining infused over 1 hour; Boehringer  
181 Ingelheim Co., Ltd).

### 182 **3.4. Randomisation**

183 A block randomisation, of which block size was 4, was performed on a 1:1 ratio using a  
184 computerized random sequence generation that was centrally administrated via a password-  
185 protected, web-based program at <http://console.tt.zhinanmed.com> (Beijing Zhinan Medical  
186 Technology Co., Ltd). The electronic data capture guarantees to make the selection in the natural  
187 order of the list filtering by study site only. Once a selection is made, the randomization record is  
188 tagged with the patient study allocated identifier, date and time of randomisation and other  
189 electronic data capture system audit values (username, machine name, etc). A tagged record  
190 cannot be selected more than once.

### 191 **3.5. Sample Size**

192 According to previous study [7], the proportion of expected excellent prognosis (mRS 0–1) at 90  
193 days in control group is estimated to be about 21%. The proportion in the experimental group is  
194 estimated to be a 9% increase, compared with the proportion in the control group. Using power =  
195 80% and two-sided alpha = 0.05 to carry out the unilateral test, the calculated sample size is 734  
196 (367 per group). In consideration of 10% lost to follow-up, the total sample size is 808.  
197 Therefore, this study included 808 subjects, with 404 patients in each group.

## 198 **4. ANALYSIS POPULATIONS**

### 199 **4.1. Study population data sets**

200 The membership of each analysis set will be determined and documented and the reasons for  
201 exclusion will be given prior to database lock. A summary table will list the individual subjects  
202 sorted by treatment group and describe their protocol deviation/violation. Two study populations  
203 will be considered in the analysis to determine efficacy and safety, as follows:

#### 204 **Modified Intention-to-treat (mITT) population**

205 All participants with valid informed consent will be included in the mITT population according  
206 to the treatment to which they are randomised, regardless of whether they prematurely  
207 discontinue treatment or are otherwise protocol violators/deviators. Participants lost to follow-up  
208 or withdrawn will not be included in the mITT population.

#### 209 **Per-protocol (PP) population**

210 The PP population will be deemed as a sub-population of the mITT population and participants  
211 will be **excluded from the mITT population** if they:

212 - Did not adhere to study treatment (e.g. treated with uncompleted argatroban treatment, or  
213 unplaned discharge).

214 This population will be used for the supportive analyses.

## 215 **Safety population**

216 This population consists of all randomised subjects who receive at least one dose of study drug.  
217 Analysis for safety endpoints will utilize this analysis set.

### 218 **4.2. Analysis Close Date**

219 The analysis close date is the date on which the last participant completed 90-day follow-up.

220 Last contact date (also referred to as Trial reference end date): the date of the last trial related  
221 procedure. For survival subjects it is defined as the maximum of

- 222 • Date of last office visit (scheduled or unscheduled visit)
- 223 • Date of the last follow-up contact (including last date on subject survival status recorded)
- 224 • Date of the last known adverse event (AE) status or lab results reported on the AE or lab  
225 clinical research from (CRF) pages, respectively

### 226 **4.3. Data cleaning**

227 The data will then be checked to ensure that there are no erroneous entries and that all missing  
228 data is properly coded. Any changes will be made on the electronic data capture database.

### 229 **4.4. Data download**

230 For each time point, once all data have been inputted and checked, the database will be locked  
231 and a data download request made. The data will be downloaded into SAS, SPSS and STATA  
232 formats for statistical analyses.

## 233 **5. STATISTICAL ANALYSES**

234 The analyses will be carried out by the trial statistician and the primary analysis will be reviewed  
235 by a second statistician. The principle of mITT will be the main strategy of the analysis adopted  
236 for the primary outcome and all the secondary outcomes.

237 **5.1. Primary Outcome Analysis**

238 **5.1.1. mITT analysis of the primary outcome - the primary analysis**

239 The primary outcome is a binary outcome: excellent functional outcome defined as mRS (0-1) at  
240 90 days. The primary analysis will be based on the mITT population as defined above.

241 The primary end point will be summarised by number (%) of participants that have excellent  
242 functional outcome by treatment group. A formal statistical analysis will be performed as a  
243 generalised linear model (GLM). In the GLM, the occurrence of excellent functional outcome at  
244 90 days will be treated as the response variable and the treatment as the only predictor. Three  
245 GLMs will be used. They will have a binomial distribution, and logit, log, identity and logit link  
246 functions, which will generate odds ratio (OR), risk ratio (RR), risk difference (RD) of having a  
247 primary outcome between argatroban plus r-tPA and r-tPA alone together with two-sided 95%  
248 confidence intervals (CIs) and p-values.

249 **5.1.2. PP analysis of the primary outcome**

250 A supportive analysis of the primary outcome will also be performed on the PP population.  
251 Statistical methods will be the same as used in the Section 5.1.1.

252 **5.1.3. Sensitivity analysis of the primary outcome**

253 A sensitivity analysis of the primary outcome will be performed to assess whether the estimated  
254 treatment effect sensitivity to the missing primary outcome. For that, the missing values in the  
255 primary outcome will be imputed using the last observation carried forward method.

256 Sensitivity analysis will be performed on both mITT and PP populations.

257 **5.1.4. Covariate adjusted analysis of the primary outcome**

258 Adjusted analyses will also be carried out on the analysis of the primary endpoint to determine  
259 whether the treatment effect estimate is affected with the inclusion of covariables. The  
260 covariables that will be included in the adjusted GLMs are:

- 261 • Age (Year, continuous);
- 262 • Sex (Male/Female);
- 263 • NIHSS score at randomisation (continuous);
- 264 • Endovascular therapy (Yes/No);
- 265 • Large artery occlusion (Yes/No);
- 266 • Time from the onset of symptom to thrombolytic time (Minute, continuous);
- 267 • Premorbid function (mRS score, continuous);
- 268 • History of stroke or transient ischaemic attack (Yes/No).

269 The two covariates “Premorbid function” and “History of stroke or transient ischaemic attack”  
270 were not considered in the original protocol but added in the statistical analysis plan because it is  
271 believed they are related to the primary outcome.

272 From the above GLM models, the adjusted OR, RR and RD and 95% CI comparing the  
273 argatroban plus r-tPA to r-tPA alone will be derived. For the above adjusted GLM model  
274 analyses, a covariate will be excluded from the analysis if the proportion of subjects with missing  
275 value is more than 30% or the proportion of subjects with Yes or No is less than 5%.

276 Imputation for baseline missing covariates (see description below **7.4 missing data**) will be made  
277 for covariate adjusted analysis.

278 The above GLM may not converge when all covariates are introduced into the model  
279 simultaneously. To avoid non-convergence issue, we will first calculate a propensity score with  
280 treatment as the dependent variable (1 for argatroban plus r-tPA and 0 for r-tPA alone) and all  
281 covariates listed above as independent variables through a logistic regression model, and then  
282 include the calculated propensity score (continuous variable) as a covariate in the GLM.

283 Covariate adjusted analysis will be performed on both mITT and PP populations.

284

### 285 **5.1.5. Subgroup analysis of the primary outcome**

286 Subgroup analysis of the primary endpoint will be performed using GLM model on the following  
287 subgroup variables:

- 288 • Age (< and  $\geq 65$  years)
- 289 • Sex (Male/Female)
- 290 • NIHSS score at randomisation (6-9 and >9)
- 291 • Endovascular therapy (Yes/No)
- 292 • Large artery occlusion (Yes/No)
- 293 • Time from the onset of symptom to thrombolytic time (< 3 and 3-4.5 hours)
- 294 • Premorbid function (mRS score, 0 and 1)
- 295 • History of stroke or TIA (Yes/No)

296 The unadjusted GLM model will be performed separately for each category of a subgroup  
297 covariate as done for the analysis of primary endpoint in Section 5.1.1 and OR with 95%CI will  
298 be presented. Subgroup analysis will be based on actual observed values of covariates and no  
299 imputation will be made for missing covariates.

300 Assessment of the homogeneity of treatment effect by a subgroup variable will be conducted by a  
301 GLM with the treatment, subgroup variable, and their interaction term as predictors, and the *P*-  
302 value presented for the interaction term.

303 Subgroup analysis will be performed on both mITT and PP populations.

## 304 **5.2. Secondary Outcome Analysis**

305 Secondary outcome analyses will be based on the mITT and PP populations.

306 **5.2.1 Analysis of binary outcomes**

307 Proportion of mRS (0-2) at 90 days, occurrence of early neurological improvement at 48 hours,  
308 and early neurological deterioration at 48 hours will be treated as a binary outcome and will be  
309 summarised by number (%) of participants with event by treatment group and analysed in a  
310 similar way as the primary end point by means of GLM. The OR, RR and RD with their two-  
311 sided 95% CIs between argatroban plus r-tPA and r-tPA alone will be estimated.

312 The analysis of ordinal outcome such as the mRS score at 90 days will also use GLM with  
313 treatment as the only predictor. The GLM model will have a multinomial distribution and  
314 cumulative logit link function, from which OR with their two-sided 95% CI comparing two  
315 treatment arms will be derived.

316 **5.2.2 Analysis of time-to-event outcomes**

317 The time-to-event outcomes (e.g. time from randomisation to the occurrence of stroke and other  
318 vascular events at the end of 90 days) will be summarised by number (%) of participants with  
319 event and incidence rate by treatment arm.

320 Survival curves will be plotted using Kaplan-Meier method and compared using the log-rank test.  
321 Cox regression model will be used to derive hazard ratio (HR) and its 2-sided 95%CI for  
322 comparing two treatment groups.

323 **5.2.3 Analysis of secondary outcomes with repeated measurements**

324 The NIHSS score is measured at admission and 14 days later.

325 These data will be managed according to the following procedures and rules before being  
326 analysed:

327 We will calculate the change in log (NIHSS score) for each patient between randomisation and  
328 14 days, and used a GLM with log (NIHSS score) as response variable, treatment as predictor,  
329 baseline measurement of log (NIHSS score) as covariate to calculate geometric mean ratio  
330 (GMR) of NIHSS score between the two groups.

331 **5.3. Exploratory Analysis**

332 Other statistical methods may be used if deemed necessary but was considered as exploratory.

333 **6. SAFETY ANALYSES**

334 **6.1. Safety Variables**

335 Safety analyses will summarise the number of safety events, including symptomatic intracerebral  
336 haemorrhage, parenchymal hematoma type 2, and major systemic bleeding occurring after  
337 randomisation.

338 In addition, summaries of the suspected relationship with trial treatment, suspected trial treatment  
339 or other cause, duration of recovered safety events, seriousness criteria, event outcome, DAIDS  
340 grade and safety events, will be presented by treatment received and overall.

341 Line listings of all reported safety events for each participant will also be presented by treatment  
342 received. They will include (where appropriate):

- 343 • Randomised treatment
- 344 • DAIDS grade
- 345 • Event description
- 346 • Seriousness criteria
- 347 • Suspected relationship to the trial medications
- 348 • Suspected products
- 349 • Other causality
- 350 • Expectedness
- 351 • Date of randomisation
- 352 • Date of onset
- 353 • Date event became serious (serious events only)
- 354 • Date of recovery
- 355 • Outcome
- 356 • Details of the treatment received

## 357 7. GENERAL CONSIDERATIONS FOR DATA ANALYSES

358 SPSS® (version 23) will be used to perform all data analyses. R may also be used for some data  
359 analyses and generate the majority of data displays.

### 360 7.1. Covariates Analyses

361 Covariate analyses will be performed on the primary outcome and secondary outcomes on the  
362 mITT and PP populations. Other covariate analyses will be performed if deemed necessary.

### 363 7.2. Subgroup Analysis

364 Subgroup analyses will be performed for the primary outcome on the mITT and PP populations.  
365 Assessment of the homogeneity of treatment effect by a subgroup variable will be conducted by a  
366 binary logistic regression with the treatment, subgroup variable, and their interaction term as  
367 predictors, and the *P*-value presented for the interaction term.

### 368 7.3. Multiplicity

369 Analyses of secondary outcomes and additional analyses for the primary outcome are regarded as  
370 exploratory in nature, therefore, multiplicity adjustment will not apply to the primary and  
371 secondary outcome analyses.

372        **7.4. Missing data**

373        **7.4.1 Baseline covariates**

374 Missing values in covariate adjusted analysis will be imputed according to the proportion of  
375 missingness.

376 If the missing values for a particular covariate be less than 5%, simple imputation methods will  
377 be used to impute the missing value for the covariate. For continuous variable, missing values  
378 will be imputed from random values assuming a normal distribution with mean and standard  
379 deviation calculated from the available sample. For categorical variables, missing values will be  
380 imputed from random values from a uniform distribution with probabilities  $p_1, p_2, \dots, p_k$ , again  
381 from the available sample. For a count variable, missing values will be imputed from random  
382 values from a Poisson distribution with mean  $\lambda$  estimated from the available sample.

383 If the proportion of missing observations for a covariate is larger than 5% but less than 30%,  
384 multiple imputation method will be used. Multiple imputations will be based on the statistical  
385 distributions of the variables pre-specified in the covariate adjusted analysis measured at the  
386 baseline assessment.

387 The seed for the imputations will be 123456.

388        **7.4.2 Efficacy outcomes**

389 Missing efficacy data will be treated as missing at random and no imputation will be made in the  
390 primary analysis. For the sensitivity analysis, primary and secondary outcomes will be imputed  
391 using the last observation carried forward method.

392        **7.5. Further Exploratory Analyses**

393 Further exploratory analyses may be carried out should they be deemed necessary; this will be at  
394 the discretion of the trial management group. These will be added to the analysis plan as an  
395 amendment along with justification, where appropriate.

396        **7.6. Data Summaries**

397 Continuous variables will be summarised according to number of subjects with non-missing data  
398 (n), mean, standard deviation, median, minimum, and maximum. The confidence interval will be  
399 added on summaries of continuous effectiveness variables.

400 Categorical variables will be summarised according to the absolute frequency and percentage of  
401 subjects (%) in each category level. The denominator for the percentages is the number of  
402 subjects in the treatment arm with data available, unless noted otherwise. Event rates per 100  
403 person years will also be reported for time-to-event clinical outcomes and adverse events of  
404 special interest.

405 **8. REFERENCES**

- 406 1. Rha JH, Saver JL. The impact of recanalization on ischemic stroke outcome: a meta-  
407 analysis. *Stroke* 2007; 38:967-73.
- 408 2. Powers WJ, Rabinstein AA, Ackerson T, et al. 2018 guidelines for the early management  
409 of patients with acute ischemic stroke: A guideline for healthcare professionals from the  
410 American Heart Association/American Stroke Association. *Stroke* 2018; 49:e46-e110.
- 411 3. Alexandrov AV, Grotta JC. Arterial reocclusion in stroke patients treated with intravenous  
412 tissue plasminogen activator. *Neurology* 2002; 59:862-7.
- 413 4. Jovin TG, Chamorro A, Cobo E, et al. Thrombectomy within 8 hours after symptom onset  
414 in ischemic stroke. *N Engl J Med* 2015; 372:2296-306.
- 415 5. Dávalos A, Cobo E, Molina CA, et al. Safety and efficacy of thrombectomy in acute  
416 ischaemic stroke (REVASCAT): 1-year follow-up of a randomised open-label trial. *The*  
417 *Lancet Neurology* 2017; 16:369-76.
- 418 6. Berkhemer OA, Fransen PS, Beumer D, et al. A randomized trial of intraarterial treatment  
419 for acute ischemic stroke. *N Engl J Med* 2015; 372:11-20.
- 420 7. van den Berg LA, Dijkgraaf MG, Berkhemer OA, et al. Two-year outcome after  
421 endovascular treatment for acute ischemic stroke. *N Engl J Med* 2017; 376:1341-9.
- 422 8. Goyal M, Demchuk AM, Menon BK, et al. Randomized assessment of rapid endovascular  
423 treatment of ischemic stroke. *N Engl J Med* 2015; 372:1019-30.
- 424 9. Campbell BCV, Mitchell PJ, Kleinig TJ, et al. Endovascular therapy for ischemic stroke  
425 with perfusion-imaging selection. *N Engl J Med* 2015; 372:1009-18.
- 426 10. Lyden P, Pereira B, Chen B, et al. Direct thrombin inhibitor argatroban reduces stroke  
427 damage in 2 different models. *Stroke* 2014; 45:896-9.
- 428 11. Tamao Y, Kikumoto R. Effect of argatroban, a selective thrombin inhibitor, on animal  
429 models of cerebral thrombosis. *Semin Thromb Hemost* 1997; 23:523-30.
- 430 12. LaMonte MP, Nash ML, Wang DZ, et al. Argatroban anticoagulation in patients with  
431 acute ischemic stroke (ARGIS-1): a randomized, placebo-controlled safety study. *Stroke*  
432 2004; 35:1677-82.
- 433 13. Wada T, Yasunaga H, Horiguchi H, et al. Outcomes of argatroban treatment in patients  
434 with atherothrombotic stroke: observational nationwide study in Japan. *Stroke* 2016; 47:471-  
435 6.
- 436 14. Ishibashi H, Koide M, Obara S, et al. High-dose argatroban therapy for stroke: novel  
437 treatment for delayed treatment and the recanalization mechanism. *J Stroke Cerebrovasc Dis*  
438 2013; 22:656-60.



- 439 15. Jang IK, Gold HK, Leinbach RC, et al. In vivo thrombin inhibition enhances and sustains  
440 arterial recanalization with recombinant tissue-type plasminogen activator. *Circ Res* 1990;  
441 67:1552-61.
- 442 16. Barreto AD, Alexandrov AV, Lyden P, et al. The argatroban and tissue-type plasminogen  
443 activator stroke study: final results of a pilot safety study. *Stroke* 2012; 43:770-5.
- 444 17. Sugg RM, Pary JK, Uchino K, et al. Argatroban tPA stroke study: study design and  
445 results in the first treated cohort. *Arch Neurol* 2006; 63:1057-62.
- 446 18. Barreto AD, Ford GA, Shen L, et al. Randomized, multicenter trial of ARTSS-2  
447 (Argatroban With Recombinant Tissue Plasminogen Activator for Acute Stroke). *Stroke*  
448 2017; 48:1608-16.
- 449 19. Molina CA, Alvarez-Sabín J, Montaner J, et al. Thrombolysis-related hemorrhagic  
450 infarction: a marker of early reperfusion, reduced infarct size, and improved outcome in  
451 patients with proximal middle cerebral artery occlusion. *Stroke*. 2002; 33: 1551-6.
- 452 20. Arenillas JF, Rovira A, Molina CA, et al. Prediction of early neurological deterioration  
453 using diffusion- and perfusion-weighted imaging in hyperacute middle cerebral artery  
454 ischemic stroke. *Stroke*. 2002; 33: 2197-203.
- 455 21. Sacco RL, Kasner SE, Broderick JP, et al. An updated definition of stroke for the 21st  
456 century: a statement for healthcare professionals from the American Heart  
457 Association/American Stroke Association. *Stroke*. 2013; 44: 2064-89.
