# Supplementary material
Source: PubMed Central journal article supplement (PMC9912168)
Supplement: jama-e230550-s003.pdf [file jama-e230550-s003.pdf]

## Supplemental Online Content

Chen HS, Cui Y, Zhou ZH, et al; for the ARAIS Investigators. Effect of Argatroban Plus Intravenous Alteplase vs Intravenous Alteplase Alone on Neurologic Function in Patients With Acute Ischemic Stroke. *JAMA*. Published online February 9, 2023. doi:10.1001/jama.2023.0550

eAppendix  
eMethods  
eFigures  
eTables

This supplemental material has been provided by the authors to give readers additional information about their work.

## Supplementary 3

### Table of Contents

|                                                                                                            |    |
|------------------------------------------------------------------------------------------------------------|----|
| eAppendix 1: Recruitment by Site in ARAIS Trial.....                                                       | 2  |
| eAppendix 2: Committee Members.....                                                                        | 4  |
| eAppendix 3: List of Investigators in ARAIS Trial.....                                                     | 5  |
| eMethods.....                                                                                              | 12 |
| eFigure 1 Follow-up CT scans in the Trial by Treatment Arm .....                                           | 13 |
| eFigure 2 Trial Profile .....                                                                              | 14 |
| eFigure 3 Distribution of Modified Rankin Scale Scores at 90 Days in the Per-Protocol Analysis...15        |    |
| eFigure 4 Primary Outcome by Prespecified Subgroups in the Full Analysis Set.....                          | 16 |
| eFigure 5 Primary Outcome by Prespecified Subgroups in the Per-Protocol Analysis.....                      | 17 |
| eFigure 6 The Activated Partial Thromboplastin Time (APTT) Data.....                                       | 18 |
| eTable 1. Baseline Characteristics in the Per-Protocol Analysis.....                                       | 19 |
| eTable 2. Sensitive Analysis for Missing Primary Outcome in Dropout Subjects in the Full Analysis Set..... | 21 |
| eTable 3. Primary and Secondary Outcomes in the Per-Protocol Analysis.....                                 | 22 |
| eTable 4. Baseline Characteristics in Patients with Missing Primary Outcome.....                           | 23 |
| eTable 5. APTT and Argatroban Infusion in the Argatroban plus alteplase group.....                         | 26 |

**eAppendix 1: Recruitment by Site in ARAIS Trial**

| <b>Inclusion site</b>                                                                     | <b>Number of patients recruited</b> |
|-------------------------------------------------------------------------------------------|-------------------------------------|
| Department of Neurology, Liaoning Health Industry Group Fukuang General Hospital          | 239                                 |
| Department of Neurology, The Affiliated Nanshi Hospital of Henan University               | 89                                  |
| Department of Neurology, Tieling County Central Hospital                                  | 75                                  |
| Department of Neurology, Tonghua Vascular Disease Hospital                                | 41                                  |
| Department of Neurology, Lvshunkou Traditional Chinese Medicine Hospital                  | 36                                  |
| Department of Neurology, Haicheng Traditional Chinese Medicine Hospital                   | 34                                  |
| Department of Neurology, Anyang People's Hospital                                         | 34                                  |
| Department of Neurology, Liaoning Health Industry Group Fuxinkuang General Hospital       | 34                                  |
| Department of Neurology, Anshan Changda Hospital                                          | 30                                  |
| Department of Neurology, General Hospital of Northern Theatre Command                     | 25                                  |
| Department of Neurology, Tianjin Beichen Traditional Chinese Hospital                     | 18                                  |
| Department of Neurology, Panjin Central Hospital                                          | 17                                  |
| Department of Neurology, Nanyang Central Hospital                                         | 17                                  |
| Department of Neurology, Fuqing Hospital                                                  | 16                                  |
| Department of Neurology, The Second Affiliated Hospital of Harbin Medical University      | 14                                  |
| Department of Neurology, Huludao Second People's Hospital                                 | 10                                  |
| Department of Neurology, Wafangdian Third Hospital                                        | 9                                   |
| Department of Neurology, Liaocheng Brain Hospital                                         | 9                                   |
| Department of Neurology, Guangxi Zhuang Autonomous Region People's Hospital               | 7                                   |
| Department of Neurology, The First Affiliated Hospital of Anhui Medical University        | 7                                   |
| Department of Neurology, The First Affiliated Hospital of Jinzhou Medical University      | 5                                   |
| Department of Neurology, Nanning First People's Hospital                                  | 5                                   |
| Department of Neurology, Tai'an County Enliang Hospital                                   | 5                                   |
| Department of Neurology, Dawa District People's Hospital                                  | 5                                   |
| Department of Neurology, Liaoyang County Stroke Hospital                                  | 5                                   |
| Department of Neurology, Beipiao Central Hospital                                         | 4                                   |
| Department of Neurology, Yunfu People's Hospital                                          | 3                                   |
| Department of Neurology, Dandong Central Hospital                                         | 3                                   |
| Department of Neurology, General Hospital of Tianjin Medical University                   | 3                                   |
| Department of Neurology, The Affiliated Hospital of Jiangnan University                   | 2                                   |
| Department of Neurology, Jiangmen People's Hospital                                       | 2                                   |
| Department of Neurology, Beijing You'anmen Hospital                                       | 2                                   |
| Department of Neurology, Department of Neurology, Xiuyan County Central People's Hospital | 2                                   |
| Department of Neurology, Tianjin First Central Hospital                                   | 2                                   |
| Department of Neurology, Beijing Tiantan Hospital                                         | 2                                   |

|                                                                                      |   |
|--------------------------------------------------------------------------------------|---|
| Department of Neurology, Liaoyang Petrochemical General Hospital                     | 2 |
| Department of Neurology, Yongzhou Central Hospital                                   | 2 |
| Department of Neurology, The Affiliated Central Hospital of Shenyang Medical College | 1 |
| Department of Neurology, Traditional Chinese Medicine Hospital of Jiangsu Provincial | 1 |
| Department of Neurology, Dalian Third People's Hospital                              | 1 |
| Department of Neurology, Ansteel Group General Hospital                              | 1 |
| Department of Neurology, Liaoyang Second People's Hospital                           | 1 |
| Department of Neurology, Tieli People's Hospital                                     | 1 |
| Department of Neurology, The First Affiliated Hospital of Qiqihar Medical College    | 1 |
| Department of Neurology, Datong Coal Mine Group General Hospital                     | 1 |
| Department of Neurology, Nei Monggo Autonomous Region People Hospital                | 1 |
| Department of Neurology, Hainan Provincial People's Hospital                         | 1 |
| Department of Neurology, The Second Affiliated Hospital of Soochow University        | 1 |
| Department of Neurology, Wuxi Xishan People's Hospital                               | 1 |
| Department of Neurology, The Third Affiliated Hospital of Jinzhou Medical University | 1 |

## **eAppendix 2: Committee Members**

### **Steering Committee**

- Xun-Ming Ji (Chairman, Xuanwu Hospital, Capital Medical University, Beijing, China)
- Hui-Sheng Chen (Chief Investigator, General Hospital of Northern Theater Command, Shenyang, China)
- Yi-Long Wang (Co-Chief Investigator, Tiantan Hospital, Capital Medical University, Beijing, China)
- Gao-Hua Li (Local Principal Investigator, Liaoning Health Industry Group Fukuang General Hospital, Fushun, China)
- Xiao-Dong Liu (Local Principal Investigator, Tonghua Vascular Disease Hospital, Tonghua, China)
- Li-Hua Wang (Local Principal Investigator, The Second Affiliated Hospital of Harbin Medical University, Harbin, China)
- Duo-Lao Wang (Senior Medical Statistician, Liverpool School of Tropical Medicine, Liverpool, UK)
- Zhong-He Zhou (Senior Trials Manager, General Hospital of Northern Theater Command, Shenyang, China)
- Ying-Jie Dai (Senior Trials Manager, General Hospital of Northern Theater Command, Shenyang, China)
- Dan Wang (Trials Manager, General Hospital of Northern Theater Command, Shenyang, China)
- Yu Cui (Medical Statistician, General Hospital of Northern Theater Command, Shenyang, China)

### **Data Monitoring Committee**

- Yi Yang (Chairman, Neurology, The First Affiliated Hospital of Jilin University, Changchun, China)
- Ding-Bo Tao (Neurology, The First Affiliated Hospital of Dalian Medical University, Dalian, China)
- Xiao-Wen Hou (Medical Statistics, Shenyang Medical College, Shenyang, China)
- Xiu-Li Shang (Neurology, The first affiliated Hospital of China Medical University, Shenyang, China)

### **Institution Human Research Ethics Committee**

- Bao-Jun Liu (Chair, General Hospital of Northern Theater Command, Shenyang, China)
- Ping Chen (Associate-chair, General Hospital of Northern Theater Command, Shenyang, China)
- Xiao-Zhong Guo (General Hospital of Northern Theater Command, Shenyang, China)
- Long Liu (General Hospital of Northern Theater Command, Shenyang, China)
- Xiao-Zeng Wang (General Hospital of Northern Theater Command, Shenyang, China)
- Zhen-Dong Zheng (General Hospital of Northern Theater Command, Shenyang, China)
- Rong-Wu Xiang (Shenyang Pharmaceutical University, Shenyang, China)
- Dong Jiang (Liaoning Hehao Law Office, Shenyang, China)
- Bin Lin (Shenyang Sport College, Shenyang, China)

### **ARAIS Staff and Support**

- Qiu-Shuang Wang (Cerebrovascular Disease Collaboration Innovation Alliance Office [CDCIA], Shenyang, China)
- Meng-Yao Ge (Cerebrovascular Disease Collaboration Innovation Alliance Office [CDCIA], Shenyang, China)
- Lu Wang (Department of Neurology, General Hospital of Northern Theater Command, Shenyang, China)
- Yue Cao (Department of Neurology, General Hospital of Northern Theater Command, Shenyang, China)
- Jin-Di Yang (Department of Neurology, General Hospital of Northern Theater Command, Shenyang, China)

### **eAppendix 3: List of Investigators in ARAIS Trial**

#### **Department of Neurology, Liaoning Health Industry Group Fukuang General Hospital, Fushun, China**

- Gao-Hua Li
- Hong Zhang
- Sheng-Ying Wang
- Kai Wang
- Xiao-Kui Ma
- Yan-Zhang Xiao
- Qi Bai
- Dong Li
- Chang-Lin Sheng
- Lin Gao
- Yang Wang
- Si Cheng
- Li-Na Huang
- Yu-Fen Chu

#### **Department of Neurology, The Affiliated Nanshi Hospital of Henan University, Nanyang, China**

- Zhao-Long Peng
- Miao Yuan
- Jin Sun
- Zhan Shen
- Bin Liu
- Lu-Kuan Qiao
- Yue-Dong Chen

#### **Department of Neurology, Tieling County Central Hospital, Tieling, China**

- Yi Zhang
- Shuai Liu
- Dan Cui
- Dong Zhang
- Guo-Ning Dong
- Na Bao

#### **Department of Neurology, Tonghua Vascular Disease Hospital, Tonghua, China**

- Xiao-Dong Liu
- Zhi-Mei Yuan
- Xiao-Ming Zhang
- Li Yang

#### **Department of Neurology, Lvshunkou Traditional Chinese Medicine Hospital, Dalian, China**

- Chang-Hao Jiang
- Cheng Fang
- Peng Wang
- Yang Sun
- Shu-Yu Sun
- Feng-Tong Yu
- Yue Pan
- Shan-Hao Zhao
- Qi Zhao

- Rui Su
- Yan-Feng Shi

**Department of Neurology, Haicheng Traditional Chinese Medicine Hospital, Haicheng, China**

- Guang-Bin Ma
- Xu Bao
- Ying Pan
- Song-Lin Zhang
- Yang Sheng
- Ying-Jie Gao
- Yu Yang
- Wan-Yu Zhu
- Ya-Nan Xia
- Jie Liu
- Ying-Wei Xu
- Fang-Ru Zhou
- Xia Wu

**Department of Neurology, Anyang People's Hospital, Anyang, China**

- Jiang-Gang Zhang
- Wei-Zheng Xie
- Yan-Peng Zhang
- Jia-Jia Li
- Qing-Xia Li

**Department of Neurology, Liaoning Health Industry Group Fuxinkuang General Hospital, Fuxin, China**

- Ying-Jie Duan
- Lian-Qun Fu
- Dong Pan
- Jia Wang
- Li-Sha Zheng
- Jing Lu
- Lei Zhao
- Tian-Wei Chen
- Shuang Yang
- Shao-Hua Chi

**Department of Neurology, Anshan Changda Hospital, Anshan, China**

- Li-Wei Zhao
- Fu-Ding Zhang
- Jun Zhang
- Nan Kong
- Fan Zhang
- Si-Heng Li
- Rao Fu

**Department of Neurology, General Hospital of Northern Theater Command, Shenyang, China**

- Hui-Sheng Chen
- Zhong-He Zhou
- Ying-Jie Dai
- Yue Cao

- Hai-Ying Wu
- Zhi-Guo Yao
- Yi-Han Wang
- Fan-Qi Ding

**Department of Neurology, Tianjin Beichen Traditional Chinese Hospital, Tianjin, China**

- Rui-Xian Wang
- Ya-Juan Shao
- Xiu-Juan Yang
- Jing Wang
- Ya-Nan An
- Xiang-Ning Zhang
- Xiao-Xia Wang

**Department of Neurology, Panjin Central Hospital, Panjin, China**

- Yuan-Lin Sun
- Bo Yang
- Ying Sun
- He Wang
- Zhen Zhang
- Zi-Jiang Guo

**Department of Neurology, Nanyang Central Hospital, Nanyang, China**

- Lei Shen
- Xin-Ming Liang
- Hai-Bo Wu

**Department of Neurology, Fuqing Hospital, Fuqing, China**

- Er-Qiang Wang
- Jian Ye
- Wu-Ping Zhuang
- Wei Lin
- Fan Chen
- Dao-Fu Lin
- Rui-Chun Zhang

**Department of Neurology, The Second Affiliated Hospital of Harbin Medical University, Harbin, China**

- Li-Hua Wang
- Pei-Fang Liu
- Xiao-Tong Kong
- Kuo Tian
- Yu Wang
- Han-Lu Cai
- Jie Li
- Hui-Xue Zhang

**Department of Neurology, Huludao Second People's Hospital, Huludao, China**

- Ye-Fang Feng
- De-Gang Li
- Wen-Huan Wang
- Yu Zhou
- Zhuo-Ran Xu



- Xiao-Yi Hou

**Department of Neurology, Wafangdian Third Hospital, Wafangdian, China**

- Ren-Lin Zou
- Xing-Guo Jiang

**Department of Neurology, Liaocheng Brain Hospital, Liaocheng, China**

- Feng-Yun Wang
- Wei-Wei Wang
- Feng-Qin Yu
- Xiu-Juan Sun

**Department of Neurology, Guangxi Zhuang Autonomous Region People's Hospital, Guangxi, China**

- He-Ping Yang
- Wei Wang
- Dong-Ju Yu
- Gui-Qiang Zhang
- Chao-Yu Chen
- Zong-Xia Lv

**Department of Neurology, The First Affiliated Hospital of Anhui Medical University, Hefei, China**

- Kai Wang
- Long Zhang
- Yu-Ting Mo

**Department of Neurology, The First Affiliated Hospital of Jinzhou Medical University, Jinzhou, China**

- Xue-Wen Liu
- Bu-Xian Tian
- Rui-Xian Xing
- Yang Bai
- Feng-Jiao Qi
- Xue-Jie Zhang

**Department of Neurology, Nanning First People's Hospital, Nanning, China**

- Zi-Long Chen
- Shi-Xin Wu
- Li-Shuo Wu
- Chun-Li Zhang
- Hao Wang

**Department of Neurology, Tai'an County Enliang Hospital, Anshan, China**

- Ming-Zhe Yu
- Chao Zheng

**Department of Neurology, Dawa District People's Hospital, Panjin, China**

- Shu-Man Huang
- Na Zhao
- Yue Wang

**Department of Neurology, Liaoyang County Stroke Hospital, Liaoyang, China**

- Lian-Qiang Wang
- Jing-Hui Chen
- Ke-Si Gao
- Tao Yu

**Department of Neurology, Beipiao Central Hospital, Beipiao, China**

- Shi-Mei Geng
- Hong Gao

**Department of Neurology, Yunfu People's Hospital, Yunfu, China**

- Shi-Huo Chen
- Yong-Yi Li
- Yuan-Bing Huang

**Department of Neurology, Dandong Central Hospital, Dandong, China**

- Wei-Zhong Wang
- Bo Peng

**Department of Neurology, General Hospital of Tianjin Medical University, Tianjin, China**

- Ming Zou
- Jin-Nan Zhang
- Hui-Ning Li

**Department of Neurology, The Affiliated Hospital of Jiangnan University, Wuxi, China**

- Ling-Ling Hu
- Ting-Gang Wang
- Mei-Qi Di

**Department of Neurology, Jiangmen People's Hospital, Jiangmen, China**

- Dan Wang
- Rong-Zhi Chen
- Hao-Jia Zhu

**Department of Stroke, Beijing You'anmen Hospital, Beijing, China**

- Shi-Yong Zhang
- Rui Qi
- Jing Wang

**Department of Neurology, Xiuyan County Central People's Hospital, Anshan, China**

- Zai-Hui Zhang
- Yuan-Hang Sun
- Zhi-Guang Luo

**Department of Neurology, Tianjin First Central Hospital, Tianjin, China**

- Zhao Jiang
- Yang Yao
- Chun-Chao Ma

**Department of Neurology, Beijing Tiantan Hospital, Beijing, China**

- Yi-Long Wang
- Ze-Yu Ding

**Department of Neurology, Liaoyang Petrochemical General Hospital, Liaoyang, China**

- Li-Yun Wang
- Xing-Yun Zuo
- Li Li
- Xing-Guo Shu

**Department of Neurology, Yongzhou Central Hospital, Yongzhou, China**

- Su-Fang Wu
- Chun-Yan He
- Chang Hu

**Department of Neurology, The Affiliated Central Hospital of Shenyang Medical College, Shenyang,**

**China**

- Run-Hui Li
- Tian-Ming Cao
- Chang Liu

**Department of Neurology, Traditional Chinese Medicine Hospital of Jiangsu Provincial, Nanjing,**

**China**

- Yong-Sheng Wang
- Qing Zhu

**Department of Neurology, Dalian Third People's Hospital, Dalian, China**

- Min Yu
- Ying Yang

**Department of Neurology, Ansteel Group General Hospital, Anshan, China**

- Li Liu
- Li-Ying Cui

**Department of Neurology, Liaoyang Second People's Hospital, Liaoyang, China**

- Kui-Hua Yang
- Jiao Zhao
- Xiao Ma

**Department of Neurology, Tieli People's Hospital, Tieli, China**

- Hui Li
- Liang Cui
- Jian-Feng Wang

**Department of Neurology, The First Affiliated Hospital of Qiqihar Medical College, Qiqihar, China**

- Hai-Jun Wang
- Rui-Qing Li
- Jin-Ling Zhang

**Department of Neurology, Datong Coal Mine Group General Hospital, Datong, China**

- Jun-Hai Wang
- Chun-Li Fu
- Yan-Qing Zhang

**Department of Neurology, The Nei Monggo Autonomous Region People Hospital, Nei Monggo,**

**China**

- Run-Xiu Zhu
- Ying Liu
- Lei Dou

**Department of Neurology, Hainan Provincial People's Hospital, Haikou, China**

- Guo-Qiang Wen
- Zhong-Yan Zhao
- Er-Yi Zhao

**Department of Neurology, The Second Affiliated Hospital of Soochow University, Soochow, China**

- Yong-Jun Cao
- Zhi-Liang Guo

**Department of Neurology, Wuxi Xishan People's Hospital, Wuxi, China**

- Qi-Da Zhou

**Department of Neurology, The Third Affiliated Hospital of Jinzhou Medical University, Jinzhou,**

**China**

- Wen-Hai Yang

- Fei-Fei Zhang
- Qi-Wen Yuan

## eMethods

**Structured interview for telephone assessment:** 90-day modified Rankin Scale scores were assessed by telephone interview using a modified version of the Structured Interview.<sup>1</sup> Item scoring was revised to be based upon functional limitations arising from both the pre-stroke period and the post-stroke period. While inter-rater reliability using this scoring method has not been validated, the approach aligns with that now generally taken in stroke trials.

**Central adjudication of outcomes:** to enhance accuracy and masking of the efficacy outcome and adverse events assessment, the 90-day modified Rankin Score was independently performed by two different assessors: a local assessor who performed the mRS interview in person or telephone, and another off-site central assessor who performed the mRS interview on telephone or through viewing a videotape of the mRS interview. If there was disagreement between local and the central assessors, a consensus was achieved by discussion. The local evaluator retained control of the final mRS score, following any discussion.

**Definition of other vascular events:** other vascular events include pulmonary embolism, peripheral vessel incident, and cardiovascular incident.

### **Clinicaltrials.gov registration**

The ARAIS trial is a prospective, random, open-label, blinded endpoint and multi-center study, which is registered at clinicaltrials.gov on 12<sup>th</sup> Nov 2018 (NCT03740958). The trial was initially set-up on 21<sup>st</sup> Dec 2018 and recruited their first patient on 8<sup>th</sup> Jan 2019.

1. Wilson JT, Hareendran A, Grant M, et al. Improving the assessment of outcomes in stroke: use of a structured interview to assign grades on the modified Rankin Scale. *Stroke*. 2002; **33**:2243-6.

**eFigure 1 Follow-up CT Scans in the Trial by Treatment Arm**

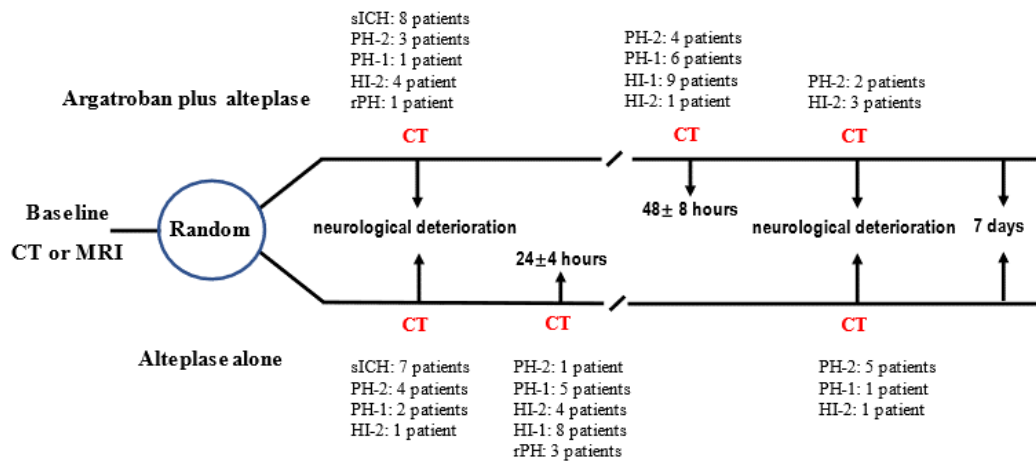

Abbreviation: CT = computed tomography; MRI = magnetic resonance imaging; sICH = symptomatic intracranial hemorrhage; PH-2 = Parenchymal hematoma type 2; PH-1 = Parenchymal hematoma type 1; HI-2 = hemorrhagic infarction type 2; HI-1 = hemorrhagic infarction type 1; rPH = remote parenchymal hemorrhage

**eFigure 2 Trial Profile**

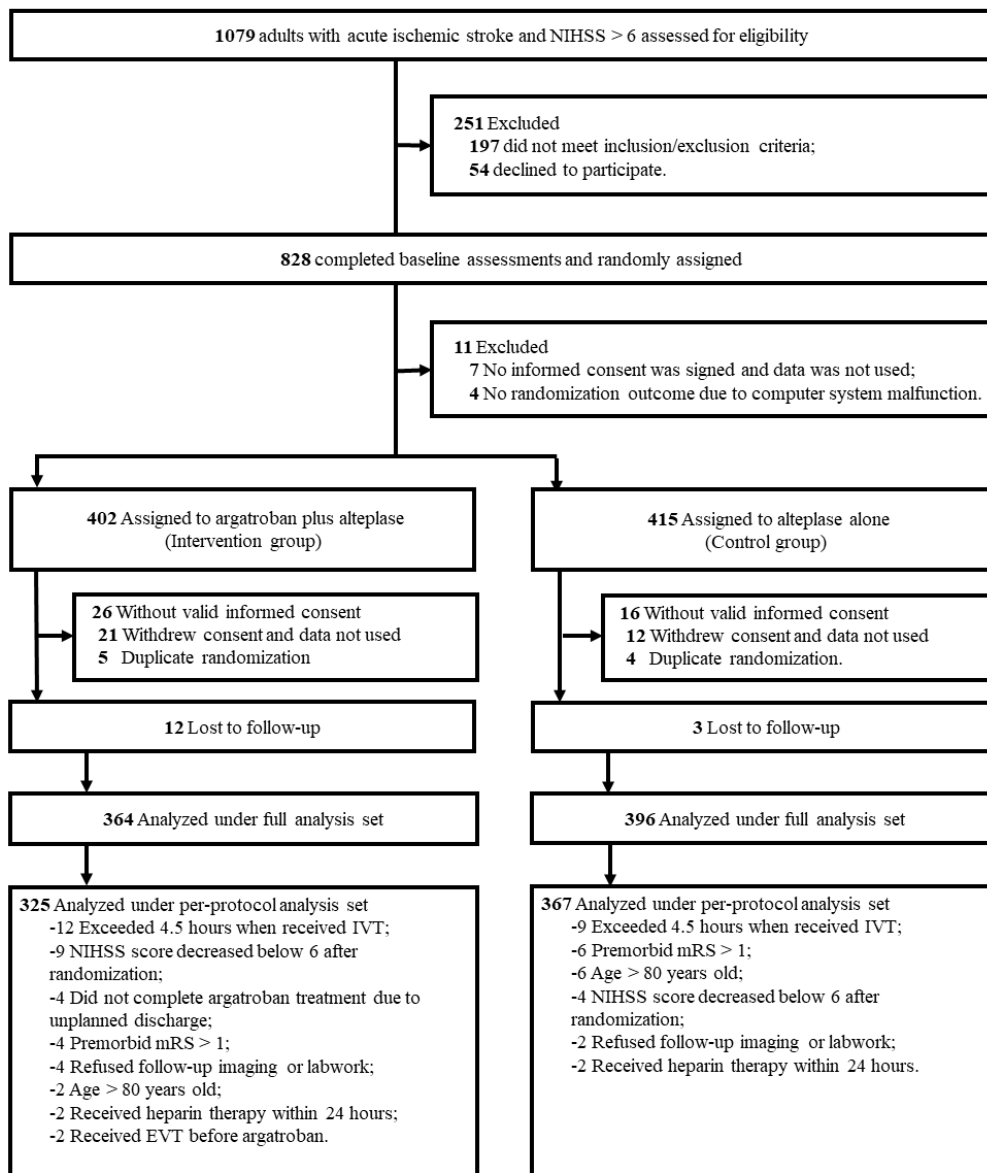

This figure shows the overall patient flow in the trial, including the full analysis set population and the per-protocol population.

Abbreviations: IVT = intravenous thrombolysis; EVT = endovascular treatment; mRS = modified Rankin Scale; NIHSS = National Institutes of Health Stroke Scale.

**eFigure 3 Distribution of Modified Rankin Scale Scores at 90 Days in the Per-Protocol Analysis**

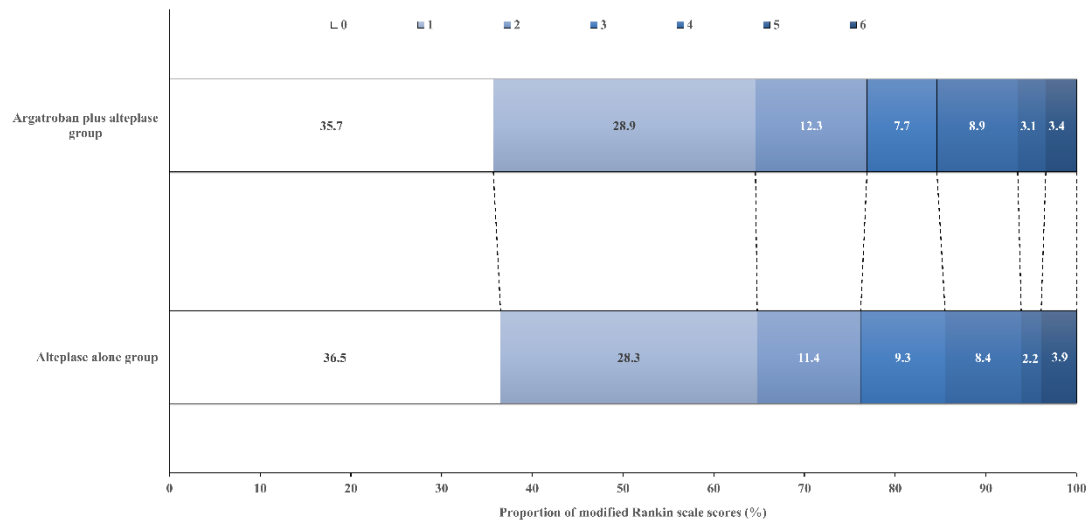

The raw distribution of scores is shown. Scores ranged from 0 to 6. 0 = no symptoms, 1 = symptoms without clinically significant disability, 2 = slight disability, 3 = moderate disability, 4 = moderately severe disability, 5 = severe disability, and 6 = death.

Treatment with Argatroban + alteplase was not associated with an excellent functional outcome (a score of 0 or 1 on the modified Rankin Scale) at 90 days, with an adjusted risk difference of -0.4% (95% CI, -7.0%-6.3%; *P* value = .92). The difference between the Argatroban + alteplase group and alteplase group in the overall distribution of scores was not significantly significant in the ordinal logistic analysis. The odds ratio was 0.98 (95% CI 0.74-1.28), and the *P* value was .86; the adjusted odds ratio was 1.03 (0.56-1.88), and the adjusted *P* value was .93.



**eFigure 4 Primary Outcome by Prespecified Subgroups in the Full Analysis Set**

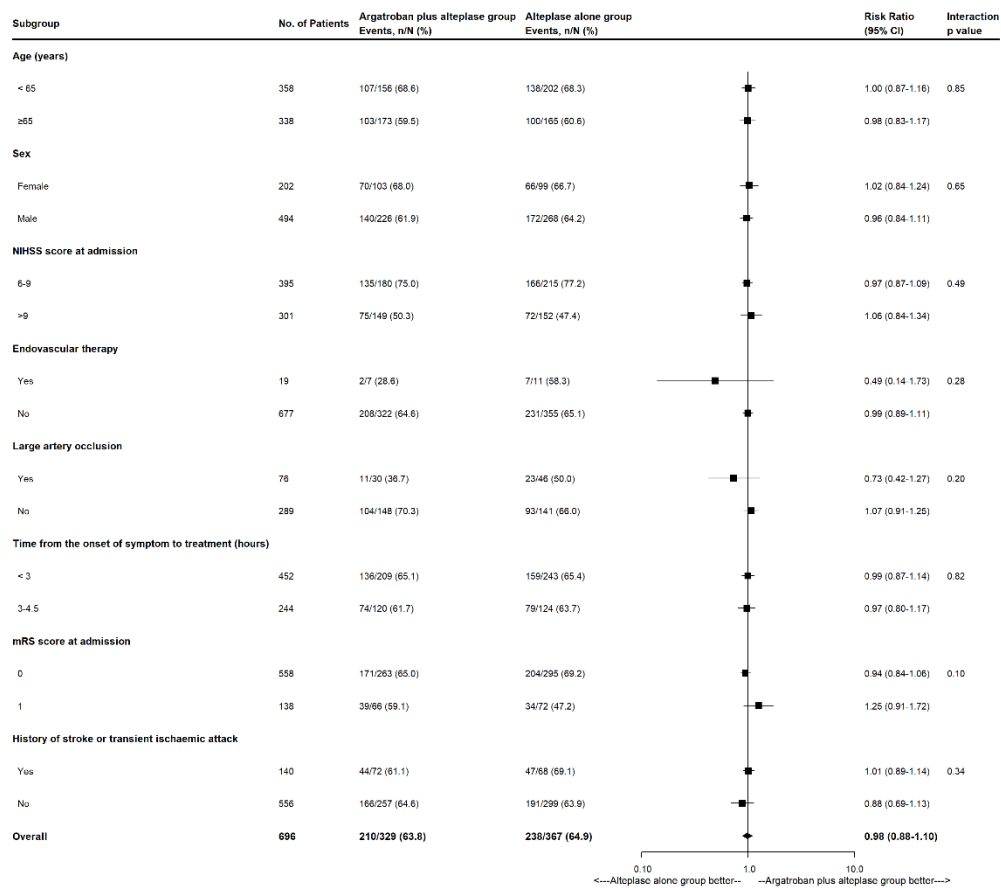

The primary outcome was a modified Rankin Scale score of 0–1 at 90 days. For subcategories, black squares represent point estimates (with the area of the square proportional to the number of events) and horizontal lines represent the 95% CI. NIHSS scores range from 0 to 42, with higher scores indicating more severe neurological deficits. For the NIHSS score, subgroups were dichotomised according to the median value.

Abbreviations: mRS = modified Rankin Scale; NIHSS = National Institutes of Health Stroke Scale.

**eFigure 5 Primary Outcome by Prespecified Subgroups in the Per-Protocol Analysis**

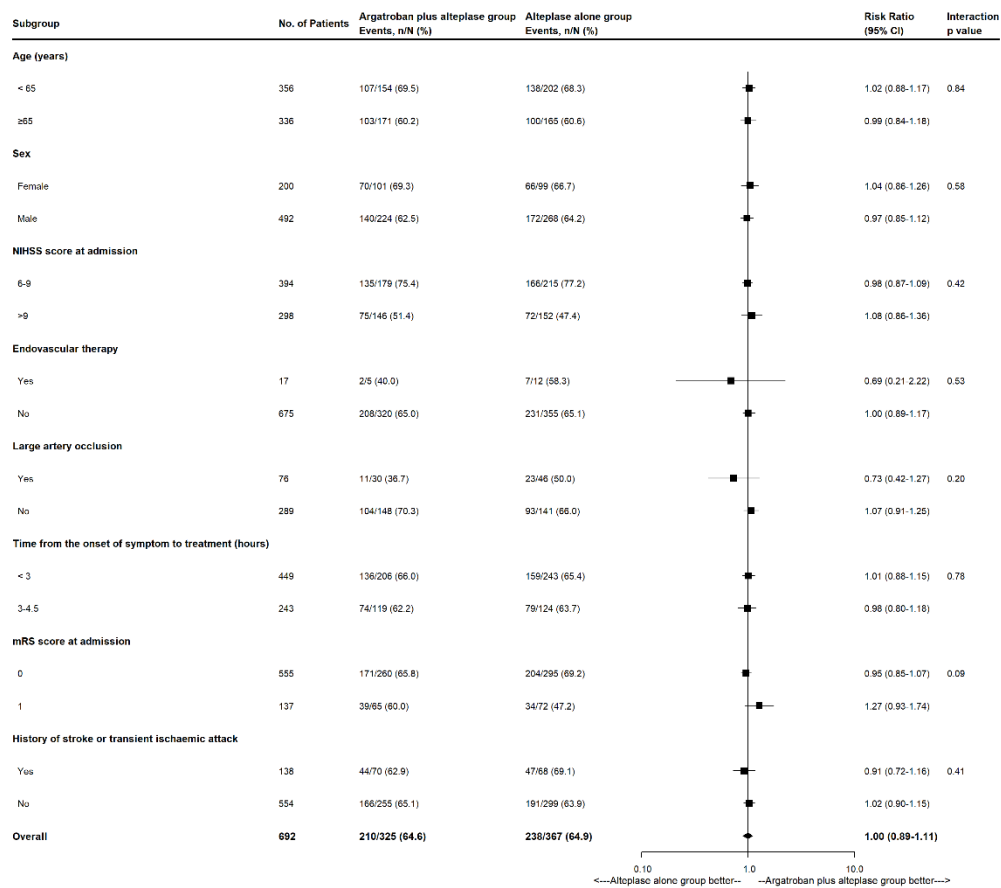

The primary outcome was a modified Rankin Scale score of 0–1 at 90 days. For subcategories, black squares represent point estimates (with the area of the square proportional to the number of events) and horizontal lines represent the 95% CI. NIHSS scores range from 0 to 42, with higher scores indicating more severe neurological deficits. For the NIHSS score, subgroups were dichotomised according to the median value.

Abbreviations: mRS = modified Rankin Scale; NIHSS = National Institutes of Health Stroke Scale.

**eFigure 6 The Activated Partial Thromboplastin Time (APTT) data: baseline, 2, 6, 12, 24 and 48 hours after randomization.**

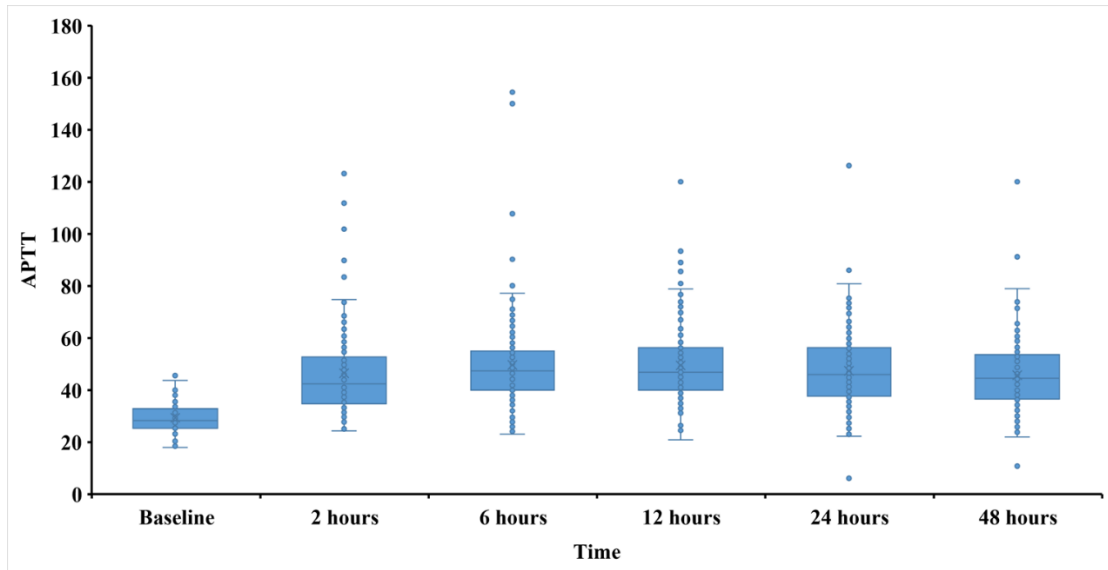

**eTable 1. Baseline Characteristics of Population in the Per-Protocol Analysis**

|                                                                             | <b>Argatroban + alteplase group (n=325)</b> | <b>Alteplase alone group (n=367)</b> |
|-----------------------------------------------------------------------------|---------------------------------------------|--------------------------------------|
| Age, median (IQR), y                                                        | 66 (58-71)                                  | 63 (55-70)                           |
| Sex                                                                         |                                             |                                      |
| Male, No. (%)                                                               | 224 (68.9%)                                 | 268 (73.0%)                          |
| Female, No. (%)                                                             | 101 (31.1%)                                 | 99 (27.0%)                           |
| Current smoker, No. (%)                                                     | 120 (36.9%)                                 | 137 (37.3%)                          |
| Current drinker, No. (%) <sup>a</sup>                                       | 65/315 (20.6%)                              | 63/360 (17.5%)                       |
| Comorbidities, No. (%) <sup>b</sup>                                         |                                             |                                      |
| Hypertension                                                                | 190 (58.5%)                                 | 208 (56.7%)                          |
| Diabetes                                                                    | 87 (26.8%)                                  | 73 (19.9%)                           |
| Previous ischemic or hemorrhagic stroke <sup>c</sup>                        | 68 (20.9%)                                  | 64 (17.4%)                           |
| Atrial fibrillation                                                         | 17/320 (5.3%)                               | 21/362 (5.8%)                        |
| Hyperlipidemia                                                              | 3 (0.9%)                                    | 3 (0.8%)                             |
| Previous transient ischaemic attack                                         | 3 (0.9%)                                    | 4 (1.1%)                             |
| Body-mass index, median (IQR), kg/m <sup>2</sup>                            | 23.7 (20.7-24.1)                            | 23.9 (21.0-24.0)                     |
| Blood pressure at randomization                                             |                                             |                                      |
| Systolic blood pressure, median (IQR), mm Hg                                | 157 (140-170)                               | 150 (136-167)                        |
| Systolic blood pressure > 140 mm Hg, No. (%)                                | 227 (69.8%)                                 | 238 (64.9%)                          |
| Diastolic blood pressure, median (IQR), mm Hg                               | 90 (81-100)                                 | 88 (80-97)                           |
| Diastolic blood pressure > 90 mm Hg, No. (%)                                | 138 (42.5%)                                 | 136 (37.1%)                          |
| Blood glucose, median (IQR), mg/dL                                          | 120.8 (102.6-171.4)                         | 121.7 (102.2-161.6)                  |
| Blood glucose > 126 mg/dL, No. (%)                                          | 120/263 (45.6%)                             | 135/301 (44.9%)                      |
| NIHSS score at randomization, median (IQR) <sup>d</sup>                     | 9 (7-12)                                    | 8 (6-12)                             |
| GRAPHS score at randomization, median (IQR) <sup>e</sup>                    | 75 (71-79)                                  | 74 (70-78)                           |
| ASPECTS score at randomization, median (IQR) <sup>f</sup>                   | 9 (8-10)                                    | 9 (8-10)                             |
| Estimated premorbid function (mRS), No. (%) <sup>g</sup>                    |                                             |                                      |
| No symptoms (score 0)                                                       | 260 (80.0%)                                 | 295 (80.4%)                          |
| Symptoms without any disability (score 1)                                   | 65 (20.0%)                                  | 72 (19.6%)                           |
| Presumed stroke cause, No. (%) §                                            |                                             |                                      |
| Undetermined cause                                                          | 213/325 (65.6%)                             | 255/366 (69.6%)                      |
| Large-artery atherosclerosis                                                | 64/325 (19.7%)                              | 69/366 (18.9%)                       |
| Small-artery occlusion                                                      | 30/325 (9.2%)                               | 26/366 (7.1%)                        |
| Cardioembolic                                                               | 17/325 (5.2%)                               | 15/366 (4.1%)                        |
| Other <sup>h</sup>                                                          | 1/325 (0.3%)                                | 1/366 (0.3%)                         |
| Location of responsible vessel, No. (%) <sup>i</sup>                        |                                             |                                      |
| Anterior circulation stroke                                                 | 141/178 (79.2%)                             | 142/187 (75.9%)                      |
| Posterior circulation stroke                                                | 32/178 (18.0%)                              | 41/187 (21.9%)                       |
| Anterior and posterior circulation stroke                                   | 5/178 (2.8%)                                | 4/187 (2.2%)                         |
| Location of responsible artery (≥ 50% stenosis), No./total (%) <sup>i</sup> |                                             |                                      |
| Internal carotid artery                                                     | 17/71 (23.9%)                               | 14/78 (17.9%)                        |
| Middle cerebral artery                                                      | 41/71 (57.7%)                               | 46/78 (59.0%)                        |
| Anterior cerebral artery                                                    | 1/71 (1.4%)                                 | 4/78 (5.1%)                          |

|                                                                                |               |               |
|--------------------------------------------------------------------------------|---------------|---------------|
| Posterior cerebral artery                                                      | 4/71 (5.6%)   | 4/78 (5.1%)   |
| Basilar artery                                                                 | 4/71 (5.6%)   | 6/78 (7.7%)   |
| Vertebral artery                                                               | 4/71 (5.6%)   | 4/78 (5.1%)   |
| Time from the onset of symptom to intravenous thrombolysis, median (IQR), mins | 155 (118-202) | 154 (112-194) |
| Time to hospital discharge, median (IQR), days                                 | 10 (7-12)     | 9 (7-13)      |
| Endovascular treatment, No. (%)                                                | 5/325 (1.5%)  | 12/367 (3.3%) |

Abbreviations: IQR = interquartile range. NIHSS = National Institutes of Health Stroke Scale. mRS = modified Rankin Scale.

a Current drinkers consume alcohol at least once a week within one year before the onset of the disease and consume alcohol continuously for more than one year.

b The comorbidities were based on patients or family report.

c Prior ischemic stroke referred only to the patients with premorbid mRS  $\leq$  1.

d Scores on National Institutes of Health Scale (NIHSS) range from 0 to 42, with higher scores indicating more severe neurologic deficit; A mean NIHSS of 8-9 means moderate neurological deficit.

e GRASPS score ranged from 0 to 101, with higher scores indicating higher risk of symptomatic intracranial hemorrhage after intravenous alteplase.

f ASPECTS score ranged from 0 to 10, with higher scores indicating worse neurologic prognosis.

g Scores on the modified Rankin Scale (mRS) of functional disability range from 0 (no symptoms) to 6 (death).

h The presumed stroke cause was classified according to the “Trial of ORG 10172 in Acute Stroke Treatment (TOAST)” using clinical findings, brain imaging, and laboratory tests. Other causes included nonatherosclerotic vasculopathies, hypercoagulable states, and hematologic disorder.

i Definite conclusions based on vessel examination. The diagnosis was based on the clinician’s interpretation of the clinical features and examination results at the time of discharge from the hospital.

**eTable 2. Sensitive Analysis for Missing Primary Outcome in Dropout Subjects.**

| Methods                                      | Without primary outcome imputation |                             |                  |         | With primary outcome imputation    |                             |                  |         |                                  |
|----------------------------------------------|------------------------------------|-----------------------------|------------------|---------|------------------------------------|-----------------------------|------------------|---------|----------------------------------|
|                                              | Argatroban + alteplase group (329) | Alteplase alone group (367) | RR (95% CI)      | P value | Argatroban + Alteplase group (402) | Alteplase alone group (415) | RR (95% CI)      | P value | Imputation methods               |
| <b>mRS score 0-1 within 90 days, No. (%)</b> | 210/329 (63.8%)                    | 238/367 (64.9%)             | 0.98 (0.88-1.10) | 0.78    | 260/402 (64.7%)                    | 267/415 (64.3%)             | 1.01 (0.84-1.21) | .92     | Last observation carried forward |
|                                              |                                    |                             |                  |         | 210/402 (52.2%)                    | 238/415 (57.3%)             | 0.89 (0.77-1.04) | .14     | Worst-case scenario              |
|                                              |                                    |                             |                  |         | 278/402 (70.4%)                    | 282/415 (68.9%)             | 1.05 (0.85-1.29) | .65     | Best-case scenario               |
|                                              |                                    |                             |                  |         | 268/402 (66.7%)                    | 275/415 (66.3%)             | 1.01 (0.91-1.11) | .92     | Multiple imputation              |

Abbreviations: CI = confidence interval; mRS = modified Rankin Scale; RR = risk ratio.

**eTable 3. Primary and Secondary Outcomes in the Per-Protocol Analysis.**

|                                                                          | Group, No. (%)                       |                         | Unadjusted               |                     |         | Adjusted <sup>a</sup>    |                     |         |
|--------------------------------------------------------------------------|--------------------------------------|-------------------------|--------------------------|---------------------|---------|--------------------------|---------------------|---------|
|                                                                          | Argatroban + alteplase group (n=325) | Alteplase group (n=367) | Risk difference (95% CI) | Risk ratio (95% CI) | P value | Risk difference (95% CI) | Risk ratio (95% CI) | P value |
| <b>Primary outcome</b>                                                   |                                      |                         |                          |                     |         |                          |                     |         |
| mRS score of 0 to 1 at 90 d <sup>b,c</sup>                               | 210 (64.6)                           | 238 (64.9)              | -0.3 (-7.4 to 6.9)       | 1.00 (0.89 to 1.11) | .95     | -0.4 (-7.0 to 6.3)       | 0.98 (0.89 to 1.08) | .65     |
| <b>Secondary outcomes</b>                                                |                                      |                         |                          |                     |         |                          |                     |         |
| mRS score of 0 to 2 within 90 d <sup>c</sup>                             | 250 (76.9)                           | 280 (76.3)              | 0.6 (-5.7 to 6.9)        | 1.01 (0.93 to 1.10) | .93     | 1.6 (-4.4 to 7.7)        | 1.02 (0.79 to 1.31) | .87     |
| Early neurologic improvement within 48 h <sup>c,d</sup>                  | 234 (72.0)                           | 261 (71.1)              | 0.9 (-5.8 to 7.6)        | 1.01 (0.92 to 1.11) | .80     | 0.1 (-6.7 to 6.8)        | 1.00 (0.91 to 1.09) | .93     |
| Early neurologic deterioration within 48 h <sup>c,e</sup>                | 10 (3.1)                             | 18 (4.9)                | -1.8 (-4.7 to 1.1)       | 0.63 (0.29 to 1.34) | .23     | -1.9 (-4.9 to 1.0)       | 0.61 (0.29 to 1.31) | .21     |
| Change in NIHSS score at day 14 from baseline, median (IQR) <sup>f</sup> | -0.37 (-0.70 to -0.14)               | -0.37 (-0.85 to -0.12)  | -0.01 (-0.07 to 0.05)    |                     | .75     | -0.01 (-0.07 to 0.05)    |                     | .84     |
| Stroke or other vascular events within 90 d <sup>g</sup>                 | 1 (0.3)                              | 1 (0.3)                 | 1.13 (0.07-18.08)        |                     | .93     | 0.78 (0.04-15.18)        |                     | .87     |
| mRS score distribution at 90 d <sup>c,h</sup>                            |                                      |                         | 0.98 (0.74-1.28)         |                     | .86     | 1.03 (0.56-1.88)         |                     | .93     |
| 0                                                                        | 116 (35.7)                           | 134 (36.5)              |                          |                     |         |                          |                     |         |
| 1                                                                        | 94 (28.9)                            | 104 (28.3)              |                          |                     |         |                          |                     |         |
| 2                                                                        | 40 (12.3)                            | 42 (11.4)               |                          |                     |         |                          |                     |         |
| 3                                                                        | 25 (7.7)                             | 34 (9.3)                |                          |                     |         |                          |                     |         |
| 4                                                                        | 29 (8.9)                             | 31 (8.4)                |                          |                     |         |                          |                     |         |
| 5                                                                        | 10 (3.1)                             | 8 (2.2)                 |                          |                     |         |                          |                     |         |

|   |          |          |  |  |  |  |
|---|----------|----------|--|--|--|--|
| 6 | 11 (3.4) | 14 (3.8) |  |  |  |  |
|---|----------|----------|--|--|--|--|

Abbreviations: CI = confidence interval; GMR = geometric mean ratio; mRS = modified Rankin Scale; NIHSS, National Institutes of Health Stroke Scale; IQR = interquartile range.

<sup>a</sup> Adjusted for pre-specified prognostic variables (age, sex, NIHSS score at randomization, time from the onset of symptoms to thrombolysis, premorbid function [mRS score 0 or 1], and history of stroke or transient ischemic attack).

<sup>b</sup> mRS scores range from 0 to 6:0, no symptoms, 1 = symptoms without clinically significant disability, 2 = slight disability, 3 = moderate disability, 4 = moderately severe disability, 5 = severe disability; and 6 = death.

<sup>c</sup> Calculated using a generalized linear model.

<sup>d</sup> Early neurologic improvement was defined as a decrease between baseline and 48 h score of  $\geq 2$  on the NIHSS score.

<sup>e</sup> Early neurologic deterioration was defined as an increase between baseline and 48 h of  $\geq 4$  on the NIHSS score, but not the result of cerebral hemorrhage.

<sup>f</sup> NIHSS scores range 0–42, with higher scores indicating greater stroke severity. The log (NIHSS+1) was analyzed using a generalized linear model. The treatment effect was presented as geometric mean ratio.

<sup>g</sup> Calculated using Cox regression model and presented by hazard ratio.

<sup>h</sup> This was used to describe a shift in measures of functioning according to the full range of scores on the mRS at 90 days and presented by odds ratio.



**eTable 4. Baseline Characteristics in Patients with Missing Primary Outcome**

|                                                                                   | <b>Argatroban + alteplase group (n=73)</b> | <b>Alteplase alone group (n=48)</b> |
|-----------------------------------------------------------------------------------|--------------------------------------------|-------------------------------------|
| Age, median (IQR), y                                                              | 66 (58-74)                                 | 68 (60-76)                          |
| <b>Sex</b>                                                                        |                                            |                                     |
| Male, No. (%)                                                                     | 45/68 (66.2%)                              | 31/44 (70.5%)                       |
| Female, No. (%)                                                                   | 23/68 (33.8%)                              | 13/44 (29.5%)                       |
| Current smoker, No. (%)                                                           | 21/67 (31.3%)                              | 6/44 (13.6%)                        |
| Current drinker, No. (%) <sup>a</sup>                                             | 8/67 (11.9%)                               | 6/44 (13.6%)                        |
| <b>Comorbidities, No. (%)<sup>b</sup></b>                                         |                                            |                                     |
| Hypertension                                                                      | 22/68 (32.4%)                              | 24/44 (54.5%)                       |
| Diabetes                                                                          | 11/68 (16.2%)                              | 14/43 (32.6%)                       |
| Previous ischemic or hemorrhagic stroke <sup>c</sup>                              | 12/68 (17.6%)                              | 10/44 (22.7%)                       |
| Atrial fibrillation                                                               | 2/41 (4.9%)                                | 1/26 (3.8%)                         |
| Hyperlipidemia                                                                    | 0/68 (0.0%)                                | 1/44 (2.3%)                         |
| Previous transient ischaemic attack                                               | 0/68 (0.0%)                                | 1/44 (2.3%)                         |
| Body-mass index, median (IQR), kg/m <sup>2</sup>                                  | 22.0 (20.1-22.8)                           | 22.8 (20.8-24.0)                    |
| <b>Blood pressure at randomization</b>                                            |                                            |                                     |
| Systolic blood pressure, median (IQR), mm Hg                                      | 140 (135-156)                              | 143 (135-160)                       |
| Systolic blood pressure > 140 mm Hg, No. (%)                                      | 28/68 (41.2%)                              | 22/44 (50.0%)                       |
| Diastolic blood pressure, median (IQR), mm Hg                                     | 85 (80-90)                                 | 88 (80-90)                          |
| Diastolic blood pressure > 90 mm Hg, No. (%)                                      | 12/68 (17.6%)                              | 9/44 (20.5%)                        |
| Blood glucose, median (IQR), mg/dL                                                | 118.3 (109.8-138.6)                        | 123.7 (109.8-183.6)                 |
| Blood glucose > 126 mg/dL, No. (%)                                                | 23/55 (41.8%)                              | 15/34 (44.1%)                       |
| NIHSS score at randomization, median (IQR) <sup>d</sup>                           | 9 (6-12)                                   | 10 (6-14)                           |
| GRAPHS score at randomization, median (IQR) <sup>e</sup>                          | 75 (68-79)                                 | 76 (71-83)                          |
| ASPECTS score at randomization, median (IQR) <sup>f</sup>                         | 9 (7-10)                                   | 8 (7-10)                            |
| <b>Estimated premorbid function (mRS), No. (%)<sup>g</sup></b>                    |                                            |                                     |
| No symptoms (score 0)                                                             | 55/68 (80.9%)                              | 31/44 (70.5%)                       |
| Symptoms without any disability (score 1)                                         | 9/68 (13.2%)                               | 7/44 (15.9%)                        |
| Mild disability (score 2)                                                         | 4/68 (5.9%)                                | 6/44 (13.6%)                        |
| <b>Presumed stroke cause, No. (%)</b>                                             |                                            |                                     |
| Undetermined cause                                                                | 28/44 (63.6%)                              | 21/35 (60.0%)                       |
| Large-artery atherosclerosis                                                      | 7/44 (15.9%)                               | 7/35 (20.0%)                        |
| Small-artery occlusion                                                            | 4/44 (9.2%)                                | 7/35 (20.0%)                        |
| Cardioembolic                                                                     | 3/44 (6.8%)                                | 0/35 (0.0%)                         |
| Other <sup>h</sup>                                                                | 2/44 (4.5%)                                | 0/35 (0.0%)                         |
| <b>Location of responsible vessel, No. (%)<sup>i</sup></b>                        |                                            |                                     |
| Anterior circulation stroke                                                       | 26/27 (96.3%)                              | 20/22 (90.9%)                       |
| Posterior circulation stroke                                                      | 1/27 (3.7%)                                | 2/22 (9.1%)                         |
| Anterior and posterior circulation stroke                                         | 0/27 (0.0%)                                | 0/22 (0.0%)                         |
| <b>Location of responsible artery (≥ 50% stenosis), No./total (%)<sup>i</sup></b> |                                            |                                     |
| Internal carotid artery                                                           | 3/11 (27.3%)                               | 2/10 (20.0%)                        |
| Middle cerebral artery                                                            | 6/11 (54.5%)                               | 6/10 (60.0%)                        |

|                                                                                |               |               |
|--------------------------------------------------------------------------------|---------------|---------------|
| Anterior cerebral artery                                                       | 1/11 (9.1%)   | 1/10 (10.0%)  |
| Posterior cerebral artery                                                      | 0/11 (0.0%)   | 1/10 (10.0%)  |
| Basilar artery                                                                 | 1/11 (9.1%)   | 0/10 (0.0%)   |
| Vertebral artery                                                               | 0/11 (0.0%)   | 0/10 (0.0%)   |
| Time from the onset of symptom to intravenous thrombolysis, median (IQR), mins | 185 (126-238) | 169 (121-225) |
| Time to hospital discharge, median (IQR), days                                 | 10 (7-12)     | 9 (7-13)      |
| Endovascular treatment                                                         | 2/68 (2.9%)   | 0/44 (0.0%)   |

Abbreviations: IQR = interquartile range. NIHSS = National Institutes of Health Stroke Scale. mRS = modified Rankin Scale.

<sup>a</sup> Current drinkers consume alcohol at least once a week within one year before the onset of the disease and consume alcohol continuously for more than one year.

<sup>b</sup> The comorbidities were based on patients or family report.

<sup>c</sup> Prior ischemic stroke referred only to the patients with premorbid mRS  $\leq$  1.

<sup>d</sup> Scores on National Institutes of Health Scale (NIHSS) range from 0 to 42, with higher scores indicating more severe neurologic deficit; A mean NIHSS of 8-9 means moderate neurological deficit.

<sup>e</sup> GRASPS score ranged from 0 to 101, with higher scores indicating higher risk of symptomatic intracranial hemorrhage after intravenous alteplase.

<sup>f</sup> ASPECTS score ranged from 0 to 10, with higher scores indicating worse neurologic prognosis.

<sup>g</sup> Scores on the modified Rankin Scale (mRS) of functional disability range from 0 (no symptoms) to 6 (death).

<sup>h</sup> The presumed stroke cause was classified according to the “Trial of ORG 10172 in Acute Stroke Treatment (TOAST)” using clinical findings, brain imaging, and laboratory tests. Other causes included nonatherosclerotic vasculopathies, hypercoagulable states, and hematologic disorder.

<sup>i</sup> Definite conclusions based on vessel examination. The diagnosis was based on the clinician’s interpretation of the clinical features and examination results at the time of discharge from the hospital.

**eTable 5. APTT and Argatroban Infusion in the Argatroban plus alteplase group.**

| Measurements, median (IQR)                       | Full analysis set | Per-protocol analysis set |
|--------------------------------------------------|-------------------|---------------------------|
| Minutes from alteplase bolus to Argatroban bolus | 46 (30-55)        | 47 (30-55)                |
| Minutes of alteplase-Argatroban overlap          | 18 (8-31)         | 19 (8-31)                 |
| Hours to (or above) target APTT                  | 5 (2-17)          | 5 (2-16)                  |
| Hours of Argatroban infusion                     | 48 (48-48)        | 48 (48-48)                |
| Hours at (or above) target APTT                  | 14 (9-26)         | 14 (9-24)                 |
| No. Argatroban infusion adjustments              | 2 (1-3)           | 2 (1-3)                   |
| First APTT after Argatroban bolus (seconds)      | 39.0 (31.3-51.7)  | 38.7 (31.2-51.8)          |
| Patients with target APTT at 2 hours             | 83 (22.8%)        | 75 (23.1%)                |

APTT indicates activated partial thromboplastin time; IQR, interquartile range.
