# Supplementary material
Source: PubMed Central journal article supplement (PMC9912168)
Supplement: jama-e230550-s004.pdf [file jama-e230550-s004.pdf]

\*Indicates required information. Only first name, last name, and suffix will appear in PubMed.

| <b>*Group Name(s): ARAIS GROUP</b>       |                   |                              |                  |                                                                                      |                                          |                                                         |                                                                                            |
|------------------------------------------|-------------------|------------------------------|------------------|--------------------------------------------------------------------------------------|------------------------------------------|---------------------------------------------------------|--------------------------------------------------------------------------------------------|
| <b>*First Name and Middle Initial(s)</b> | <b>*Last Name</b> | <b>*Suffix (eg, Jr, III)</b> | Academic Degrees | Institution                                                                          | Location (city, state/province, country) | Role or Contribution, eg, chair, principal investigator | Group (if more than 1 Group listed in the byline) and/or Subgroup (eg, Steering Committee) |
| Xue-Wen                                  | Liu               |                              | MD               | Department of Neurology, The First Affiliated Hospital of Jinzhou Medical University | Jinzhou, Liaoning, China                 | principal investigator                                  |                                                                                            |
| Zi-Long                                  | Chen              |                              | BSM              | Department of Neurology, Nanning First People's Hospital                             | Nanning, Guangxi, China                  | principal investigator                                  |                                                                                            |
| Ming-Zhe                                 | Yu                |                              | BSM              | Department of Neurology, Tai'an County Enliang Hospital                              | Anshan, Liaoning, China                  | principal investigator                                  |                                                                                            |
| Shu-Man                                  | Huang             |                              | BSM              | Department of Neurology, Dawa District People's Hospital                             | Panjin, Liaoning, China                  | principal investigator                                  |                                                                                            |
| Lian-Qiang                               | Wang              |                              | BSM              | Department of Neurology, Liaoyang County Stroke Hospital                             | Liaoyang, Liaoning, China                | principal investigator                                  |                                                                                            |
| Shi-Mei                                  | Geng              |                              | BSM              | Department of Neurology, Beipiao Central Hospital                                    | Chaoyang, Liaoning, China                | principal investigator                                  |                                                                                            |
| Shi-Huo                                  | Chen              |                              | BSM              | Department of Neurology, Yunfu People's Hospital                                     | Yunfu, Guangdong, China                  | principal investigator                                  |                                                                                            |
| Wei-Zhong                                | Wang              |                              | BSM              | Department of Neurology, Dandong Central Hospital                                    | Dandong, Liaoning, China                 | principal investigator                                  |                                                                                            |
| Ming                                     | Zou               |                              | MD               | Department of Neurology, General Hospital of Tianjin Medical University              | Tianjin, China                           | principal investigator                                  |                                                                                            |
| Ling-Ling                                | Hu                |                              | BSM              | Department of Neurology, The Affiliated Hospital of Jiangnan University              | Wuxi, Jiangsu, China                     | principal investigator                                  |                                                                                            |
| Dan                                      | Wang              |                              | MM               | Department of Neurology, Jiangmen People's Hospital                                  | Jiangmen, Guangdong, China               | principal investigator                                  |                                                                                            |
| Shi-Yong                                 | Zhang             |                              | MM               | Department of Stroke, Beijing You'anmen Hospital                                     | Beijing, China                           | principal investigator                                  |                                                                                            |
| Zai-Hui                                  | Zhang             |                              | BSM              | Department of Neurology, Xiuyan County Central People's Hospital                     | Anshan, Liaoning, China                  | principal investigator                                  |                                                                                            |
| Zhao                                     | Jiang             |                              | MM               | Department of Neurology, Tianjin First Central Hospital                              | Tianjin, China                           | principal investigator                                  |                                                                                            |

## Supplemental Online Content: Nonauthor Collaborators

\*Indicates required information. Only first name, last name, and suffix will appear in PubMed.

| *First Name and Middle Initial(s) | *Last Name | *Suffix (eg, Jr, III) | Academic Degrees | Institution                                                                          | Location (city, state/province, country) | Role or Contribution, eg, chair, principal investigator | Group (if more than 1 Group listed in the byline) and/or Subgroup (eg, Steering Committee) |
|-----------------------------------|------------|-----------------------|------------------|--------------------------------------------------------------------------------------|------------------------------------------|---------------------------------------------------------|--------------------------------------------------------------------------------------------|
| Li-Yun                            | Wang       |                       | BSM              | Department of Neurology, Liaoyang Petrochemical General Hospital                     | Liaoyang,Liaoning,China                  | principal invesigator                                   |                                                                                            |
| Su-Fang                           | Wu         |                       | MM               | Department of Neurology, Yongzhou Central Hospital                                   | Yongzhou,Hunan,China                     | principal invesigator                                   |                                                                                            |
| Run-Hui                           | Li         |                       | MM               | Department of Neurology, The Affiliated Central Hospital of Shenyang Medical College | Shenyang,Liaoning,China                  | principal invesigator                                   |                                                                                            |
| Yong-Sheng                        | Wang       |                       | MM               | Department of Neurology, Traditional Chinese Medicine Hospital of Jiangsu Provincial | Nanjing,Jiangsu,China                    | principal invesigator                                   |                                                                                            |
| Min                               | Yu         |                       | MM               | Department of Neurology, Dalian Third People's Hospital                              | Dalian,Liaoning,China                    | principal invesigator                                   |                                                                                            |
| Li                                | Liu        |                       | MM               | Department of Neurology, Ansteel Group General Hospital                              | Anshan,Liaoning,China                    | principal invesigator                                   |                                                                                            |
| Kui-Hua                           | Yang       |                       | BSM              | Department of Neurology, Liaoyang Second People's Hospital                           | Liaoyang,Liaoning,China                  | principal invesigator                                   |                                                                                            |
| Hui                               | Li         |                       | MM               | Department of Neurology, Tieli People's Hospital                                     | Yichun,Heilongjiang,China                | principal invesigator                                   |                                                                                            |
| Hai-Jun                           | Wang       |                       | MM               | Department of Neurology, The First Affiliated Hospital of Qiqihar Medical College    | Qiqihar,Heilongjiang,China               | principal invesigator                                   |                                                                                            |
| Jun-Hai                           | Wang       |                       | BSM              | Department of Neurology, Datong Coal Mine Group General Hospital                     | Datong,Shanxi,China                      | principal invesigator                                   |                                                                                            |
| Run-Xiu                           | Zhu        |                       | MM               | Department of Neurology, The Nei Monggo Autonomous Region People Hospital            | Hohhot,Inner Mongolia,China              | principal invesigator                                   |                                                                                            |
| Guo-Qiang                         | Wen        |                       | BSM              | Department of Neurology, Hainan Provincial People's Hospital                         | Haikou,Hainan,China                      | principal invesigator                                   |                                                                                            |
| Yong-Jun                          | Cao        |                       | MD               | Department of Neurology, The Second Affiliated Hospital of Soochow University        | Suzhou,Jiangsu,China                     | principal invesigator                                   |                                                                                            |

Supplemental Online Content: Nonauthor Collaborators

\*Indicates required information. Only first name, last name, and suffix will appear in PubMed.

| <b>*First Name and Middle Initial(s)</b> | <b>*Last Name</b> | <b>*Suffix (eg, Jr, III)</b> | Academic Degrees | Institution                                                                          | Location (city, state/province, country) | Role or Contribution, eg, chair, principal investigator | Group (if more than 1 Group listed in the byline) and/or Subgroup (eg, Steering Committee) |
|------------------------------------------|-------------------|------------------------------|------------------|--------------------------------------------------------------------------------------|------------------------------------------|---------------------------------------------------------|--------------------------------------------------------------------------------------------|
| Qi-Da                                    | Zhou              |                              | BSM              | Department of Neurology, Wuxi Xishan People's Hospital                               | Wuxi, Jiangsu, China                     | principal investigator                                  |                                                                                            |
| Wen-Hai                                  | Yang              |                              | MM               | Department of Neurology, The Third Affiliated Hospital of Jinzhou Medical University | Jinzhou, Liaoning, China                 | principal investigator                                  |                                                                                            |
