# Supplementary material
Source: PubMed Central journal article supplement (PMC9912168)
Supplement: jama-e230550-s005.pdf [file jama-e230550-s005.pdf]

## Data Sharing Statement

### Data

**Data available:** Yes

**Data types:** Data dictionary

**How to access data:** [chszh@aliyun.com](mailto:chszh@aliyun.com)

**When available:** With publication

### Supporting Documents

**Document types:** None

### Additional Information

**Who can access the data:** researchers whose proposed use of the data has been approved

**Types of analyses:** for any purpose or for a specified purpose

**Mechanisms of data availability:** with investigator support after approval of a proposal
